# Supplementary material
Source: Springer Nature journal article supplement (https://www.springermedizin.de/resource/supplementary/12911_2009_363_MOESM5_ESM.pdf/9525574)

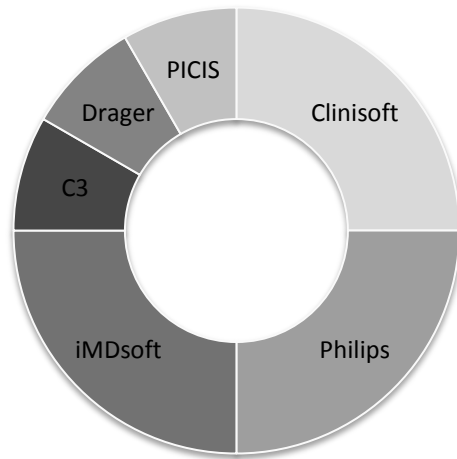

Supplement: MOESM5 [file 9525574]
